# Supplementary material for: Flow modification enhancing the growth rate in top seeded solution growth of SiC crystals
Source: Royal Society of Chemistry journal article supplement (doi:10.1039/c9ra04930d), 2019-01-01
Supplement: c9ra04930d1.pdf [file c9ra04930d1.pdf]

Supporting information:

## Flow modification enhancing the growth rate in top seeded solution growth of SiC crystals

*Minh-Tan Ha,<sup>†,‡</sup> Young-Jae Yu,<sup>†</sup> Yun-Ji Shin,<sup>†</sup> Si-Young Bae,<sup>†</sup> Myung-Hyun Lee,<sup>†</sup> Cheol-Jin Kim,<sup>‡</sup> and Seong-Min Jeong<sup>\*,†</sup>*

<sup>†</sup>Energy and Environmental Division, Korea Institute of Ceramic Engineering and Technology, Jinju-si 52851, Korea

<sup>‡</sup>Department of Ceramic Engineering, Gyeongsang National University, Jinju-si 52828, Korea

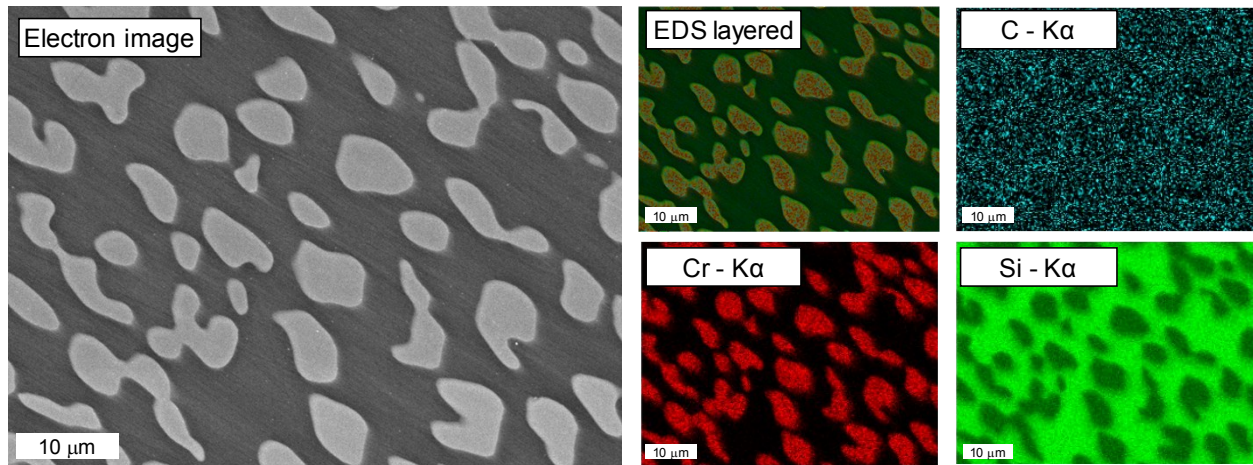

**Figure S11.** FE-SEM image and EDS element mappings of a cross-sectioned solidified melt of 90% Si – 10% Cr. In the FE-SEM image, the bright region and dark region were found to be Cr-rich phase and Si-rich phase with EDS mapping, respectively. The distinguished Cr-rich phase enables the investigation of the melt fluid flow.
